# Supplementary material
Source: PubMed Central journal article supplement (PMC9356368)
Supplement: jama-e2214092-s001.pdf [file jama-e2214092-s001.pdf]

## Supplemental Online Content

Rewers M, Bonifacio E, Ewald D, et al; ASK Study Group; Fr1da Study Group. SARS-CoV-2 infections and presymptomatic type 1 diabetes autoimmunity in children and adolescents from Colorado, USA, and Bavaria, Germany. *JAMA*. doi:10.1001/jama.2022.14092

### **eMethods**

### **eReferences**

This supplemental material has been provided by the authors to give readers additional information about their work.

## eMethods

### SARS-CoV-2 antibody detection

**Colorado:** In ASK participants, total SARS-CoV-2 antibodies, including IgM, IgG, IgA, and IgD to receptor binding domain of the spike protein (RBD) and, separately, to nucleocapsid protein (NP) were measured by electrochemiluminescent (ECL) assay<sup>1</sup>. An RBD antibody index >5 defined past SARS-CoV2 infection in an unvaccinated child. In children who have received a SARS-CoV-2 vaccine, NP antibody index >5 defined past SARS-CoV2 infection. In addition, parents of 359 ASK participants reported that their child had received a positive SARS-CoV-2 diagnostic test prior to the screening. Of those, 37 children were negative for the RBD antibody, but were included in the analyses as previously SARS-CoV-2 infected.

**Bavaria:** In Fr1da participants, SARS-CoV-2 antibodies to RBD and NP were measured using a luciferase immunoprecipitation system (LIPS) as previously described<sup>2</sup>. An RBD antibody level > 1 arbitrary unit (AU) and NP antibody level > 13 AU defined past SARS-CoV2 infection. The requirement for NP positivity was important in 2020 when the prevalence of infection was ~0.1%; while NP antibodies do not appear to add to the screening accuracy in 2021, the criteria for positivity were not changed. SARS-CoV-2 vaccines were not available to German children younger than 11 y during the study period.

### Measurement of islet autoantibodies

**Colorado:** In ASK participants, autoantibodies to insulin, GAD, IA-2, and ZnT8 were measured in the Immunogenetics Laboratory at the Barbara Davis Center using previously described radiobinding assays (RBA) and high-affinity ECL assays<sup>3-5</sup>. In the 2020 Islet Autoantibody Standardization Program (IASP) Workshop, sensitivities and specificities, respectively, for the RBA among patients newly diagnosed with type 1 diabetes were 62% and 99% for insulin, 78% and 99% for GAD, 72% and 100% for IA-2, and 74%

and 100% for ZnT8 autoantibodies. For ECL they were 66% and 99% for insulin, 78% and 100% for GAD, 72% and 100% for IA-2, and 74% and 100% for ZnT8 autoantibodies. A single autoantibody in ASK is associated with a 30% risk of progression to clinical diabetes in the next 5-years<sup>5</sup>.

**Bavaria:** In Fr1da participants, autoantibodies to insulin, GAD, IA2, and ZnT8 were measured at the Helmholtz Institute using previously described methods<sup>6</sup>. First-line screening was performed with a sensitive enzyme-linked immunosorbent assay (3 Screen; RSR Ltd) to detect autoantibodies to GAD, IA-2, and ZnT8<sup>7</sup>, and with a luciferase immunoprecipitation system (LIPS) assay to detect insulin autoantibodies in serum prepared from capillary blood<sup>8</sup>. Screening samples positive for islet autoantibodies and confirmation venous blood samples were tested for autoantibodies to insulin, GAD, IA-2, and ZnT8 using reference radiobinding assays. In the 2020 IASP Workshop, sensitivities and specificities were 94% and 100% for the 3 Screen ELISA, 46% and 98% for the LIPS insulin autoantibodies. For the radiobinding assays, they were 48% and 98% for insulin, 74% and 100% for GAD, 74% and 100% for IA-2, and 76% and 100% for ZnT8 autoantibodies. Single autoantibody positivity in Fr1da is defined by higher cutoffs, high-affinity, and positivity in two different assay formats (LIPS and RBA or RBA and ELISA) and predicts a 40% risk of progression to clinical diabetes in 10 years in genetically susceptible children<sup>9</sup>.

## eReferences

1. Jia X, Gesualdo P, Geno Rasmussen C, et al. Prevalence of SARS-CoV-2 Antibodies in Children and Adults with Type 1 Diabetes. *Diabetes Technol Ther.* 2021;23(7):517-521.

2. Hippich M, Holthaus L, Assfalg R, et al. A Public Health Antibody Screening Indicates a 6-Fold Higher SARS-CoV-2 Exposure Rate than Reported Cases in Children. *Med (N Y)*. 2021;2(2):149-163 e4.
3. Yu L, Rewers M, Gianani R, et al. Antiislet autoantibodies usually develop sequentially rather than simultaneously. *J Clin Endocrinol Metab*. 1996;81(12):4264-4267.
4. Bonifacio E, Yu L, Williams AK, et al. Harmonization of glutamic acid decarboxylase and islet antigen-2 autoantibody assays for national institute of diabetes and digestive and kidney diseases consortia. *J Clin Endocrinol Metab*. 2010;95(7):3360-7.
5. Steck AK, Fouts A, Miao D, et al. ECL-IAA and ECL-GADA Can Identify High-Risk Single Autoantibody-Positive Relatives in the TrialNet Pathway to Prevention Study. *Diabetes Technol Ther*. 2016;18(7):410-4.
6. ZieglerAG, Kick K, Bonifacio E, et al. Yield of a Public Health Screening of Children for Islet Autoantibodies in Bavaria, Germany. *JAMA*. 2020;323(4):339-351.
7. Amoroso M, Achenbach P, Powell M, et al. 3 Screen islet cell autoantibody ELISA: A sensitive and specific ELISA for the combined measurement of autoantibodies to GAD65, to IA-2 and to ZnT8. *Clinica chimica acta*. 2016;462:60-64.
8. Liberati D, Wyatt RC, Brigatti C, et al. A novel LIPS assay for insulin autoantibodies. *Acta Diabetol*. 2018;55(3):263-270.
9. Giannopoulou EZ, Winkler C, Chmiel R, et al. Islet autoantibody phenotypes and incidence in children at increased risk for type 1 diabetes. *Diabetologia*. 2015;58(10):2317-23.
